# Supplementary material
Source: PubMed Central journal article supplement (PMC3307641)
Supplement: supp_M020438_jlr.M020438-1.pdf [file supp_M020438_jlr.M020438-1.pdf]

## Supplemental Figure 1.

**A.**

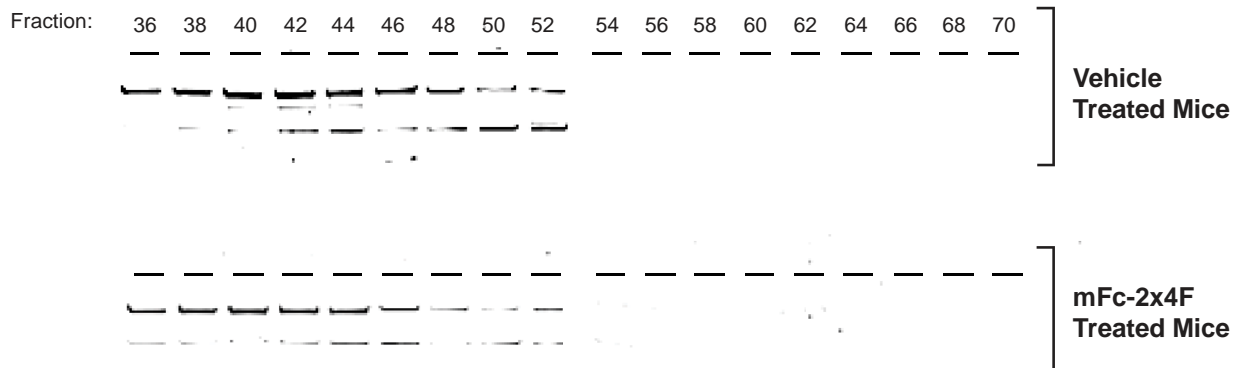

**B.**

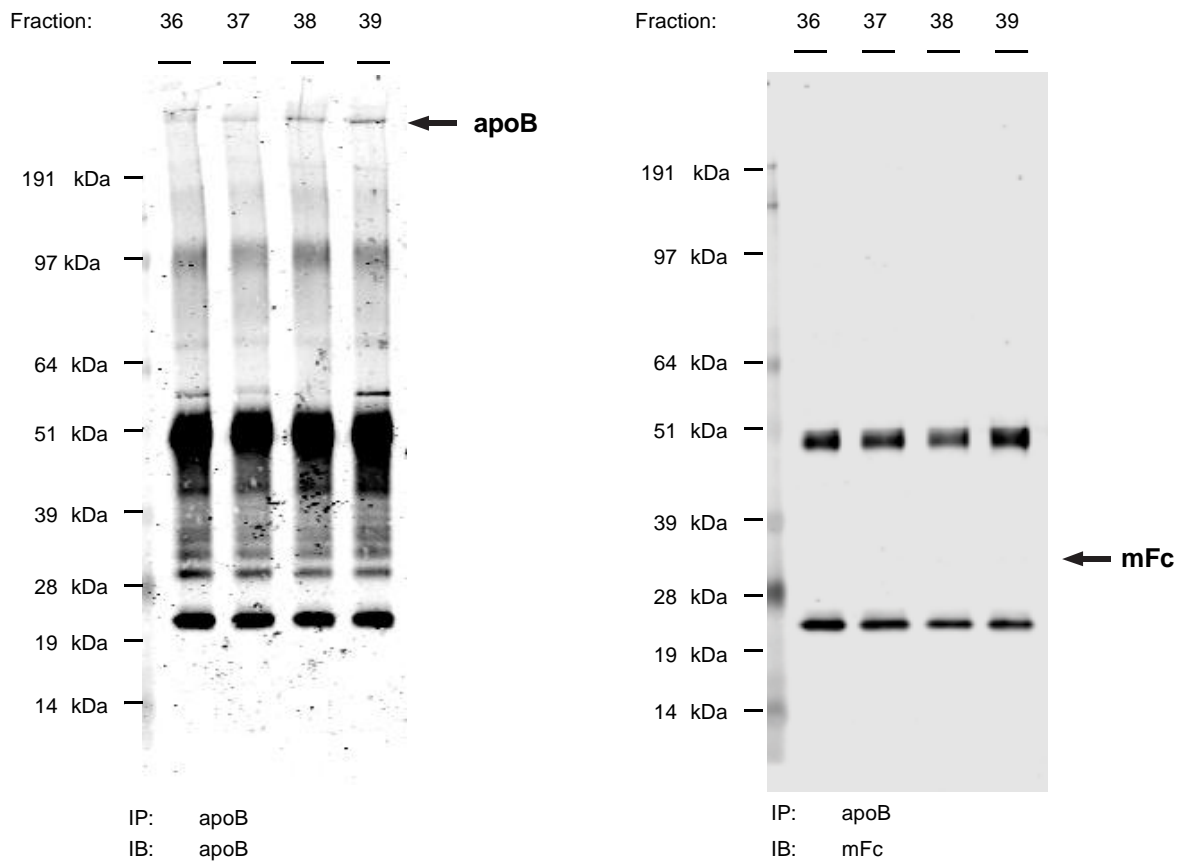

Supplemental Figure 1. A, apoB Western Blot. Even numbered fractions 36-70 from figure 5C were ran on 4-12% SDS-PAGE and immunoblotted for apoB. B, Immunoprecipitation of fractions 36-39. Indicated fractions were immunoprecipitated using apoB antibody as described in Material and Methods. The membrane was immunoblotted with anti-apoB and anti-mFc.

## Supplemental Figure 2.

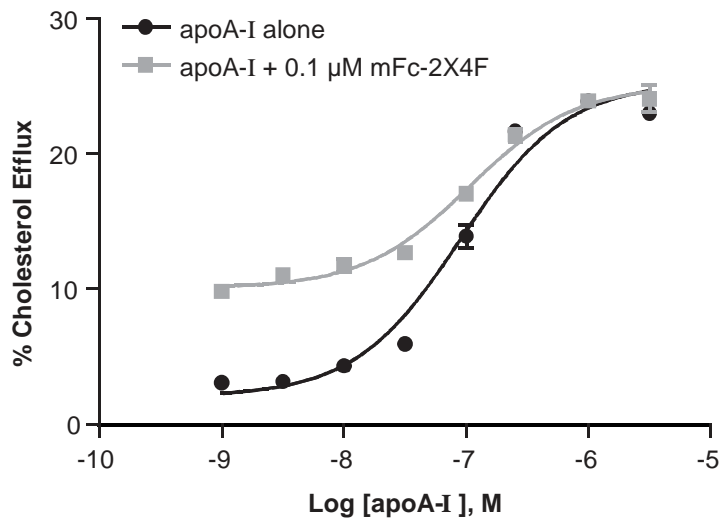

Supplemental Figure 2. Additive effects of mFc-2X4F and apoA-I on cholesterol efflux in 293 ABCA1 recombinant cells. Cellular cholesterol was labeled with  $1\mu\text{Ci/ml}$  [ $^3\text{H}$ ] cholesterol for 24 hrs in media supplemented with 1% LPDS and equilibrated overnight before the treatment. Cells were treated with apoA-I alone or combination of apoA-I and mFc-2X4F for 4 hrs.
